## Baseline clinical features in a large-scale registration survey of patient with hypertrophic cardiomyopathy throughout Japan: J-HCM registry study

T. Kubo<sup>1</sup>, H. Takano<sup>2</sup>, M. Takayama<sup>3</sup>, Y.L. Doi<sup>1</sup>, Y. Minami<sup>4</sup>, M. Ebato<sup>5</sup>, T. Inomata<sup>6</sup>, T. Katoh<sup>7</sup>, R. Okamoto<sup>8</sup>, T. Chikamori<sup>9</sup>, E. Watanabe<sup>10</sup>, A. Furugen<sup>11</sup>, Y. Maekwa<sup>12</sup>, W. Shimizu<sup>2</sup>, H. Kitaoka<sup>1</sup>

<sup>1</sup>Kochi Medical School, Kochi, Japan; <sup>2</sup>Nippon Medical School Teaching Hospital, Tokyo, Japan; <sup>3</sup>Sakakibara Heart Institute, Fucyu Tokyo, Japan; <sup>4</sup>Tokyo Women's Medical University, Tokyo, Japan; <sup>5</sup>Showa University Fujigaoka Hospital, Yokohama, Japan; <sup>6</sup>Kitasato University School of Medicine, Sagami-hara, Japan; <sup>7</sup>Kyoto University, Kyoto, Japan; <sup>8</sup>Mie University Graduate School of Medicine, Tsu, Japan; <sup>9</sup>Tokyo Medical University Hospital, Tokyo, Japan; <sup>10</sup>Fujita Health University School of Medicine, Toyoake, Japan; <sup>11</sup>Sapporo Cardio Vascular Clinic, Sapporo, Japan; <sup>12</sup>Hamamatsu University School of Medicine, Hamamatsu, Japan

**Funding Acknowledgement:** Type of funding source: None

**Background:** Hypertrophic cardiomyopathy (HCM) is a most prevalent primary myocardial disorder with heterogeneous clinical features. However, there have been few studies on clinical features of HCM as a prospective cohort. In 2015, we established a large-scale registration survey of patients with HCM throughout Japan, named J-HCM registry study.

**Purpose:** The aim of this study was to clarify the clinical features of Japanese patients with HCM.

**Methods:** J-HCM registry study is a prospective, multicenter investigation, consisting of 24 hospitals. This time, we present the baseline clinical characteristics in this survey.

**Results:** Total 1484 patients were registered. The ages at registration and at diagnosis were  $65 \pm 15$  and  $56 \pm 17$  years, respectively, and 806 patients (54%) were men. Majority of the patients (95%) was NYHA class I or II. With regard to subtypes of HCM, there were 526 patients (36%) in the HCM with left ventricular (LV) outflow tract obstruction, 126 patients (8%) in the mid-ventricular obstruction, 57 patients (4%) in the end-stage phase characterized by LV ejection fraction  $< 50\%$ , and 197 patients (14%) in aperi-

cal HCM. At registration, 80 patients (6%) had prior successful recovery from sustained ventricular tachycardia or ventricular fibrillation, 162 patients (11%) suffered from heart failure hospitalization, and 64 patients (4%) had history of embolic event. Regarding invasive treatment, 160 patients (10%) had prior septal reduction therapy and 162 patients (11%) had ICD implantation. According to the 2014 European Society of Cardiology Guidelines on sudden cardiac death (SCD) prevention, the study patients were divided into 3 categories by the HCM Risk-SCD calculator: patients distribution, 4% in the high risk group ( $\geq 6\%$  calculated HCM Risk-SCD at 5 years), 7% in the intermediate risk group ( $4\%$  to  $< 6\%$ ), 69% in the low risk group ( $< 4\%$ ), and 16% in the patients with extreme characteristics (Figure 1).

**Conclusions:** In this multicenter registration survey of patients with HCM, the baseline clinical characteristics were almost similar to several retrospective large-scale cohorts in Western countries except older age and less symptomatic state. This study will provide important knowledge regarding management of HCM.

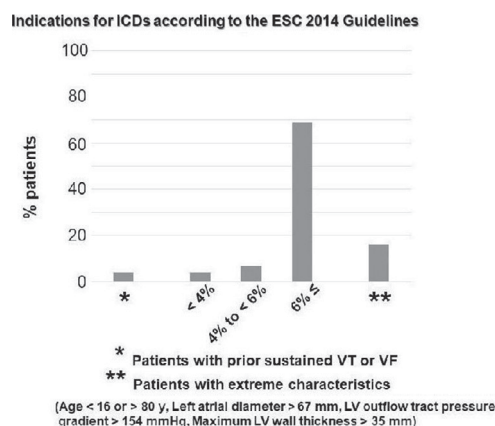

Figure 1
